# Supplementary material for: Bioactive Compounds Obtained from Polish “Marynka” Hop Variety Using Efficient Two-Step Supercritical Fluid Extraction and Comparison of Their Antibacterial, Cytotoxic, and Anti-Proliferative Activities In Vitro
Source: MDPI journal article supplement (doi:10.3390/molecules26082366), 2021-04-19
Supplement: s1 [file s1]

# SUPPLEMENTARY

**Supplementary Table S1.** Minimum bactericidal concentration (MBC) of compounds from Marynka hop variety

| Bacteria                            | Minimum bactericidal concentration (MBC) [µg/ml] |                 |
|-------------------------------------|--------------------------------------------------|-----------------|
|                                     | Crude extract (E1)                               | XN              |
| <i>S. aureus</i><br>ATCC 25923      | 0.391                                            | 1.564           |
| <i>S. epidermidis</i><br>ATCC 12228 | 1.96                                             | 1.564           |
| <i>S. mutans</i><br>PCM 2502        | 0.781                                            | 1.564           |
| <i>S. sanguinis</i><br>PCM 2335     | 1.562                                            | 62.5            |
| <i>P. acnes</i><br>PCM 2400         | 31.25                                            | ND <sup>a</sup> |
| <i>P. acnes</i><br>PCM 2334         | 62.5                                             | 250             |

<sup>a</sup> ND– not detected in tested concentration range
